# Supplementary material for: Red emissive organic light-emitting diodes based on codeposited inexpensive CuI complexes
Source: Royal Society of Chemistry journal article supplement (doi:10.1039/c5tc00727e), 2015-01-01
Supplement: c5tc00727e1.pdf [file c5tc00727e1.pdf]

## Red Emissive Organic Light-Emitting Diodes based on Codeposited Inexpensive Cu<sup>I</sup> Complex

Tianchi Ni,<sup>a</sup> Xiaochen Liu,<sup>a</sup> Tao Zhang,<sup>b</sup> Hongliang Bao,<sup>c</sup> Ge Zhan,<sup>a</sup> Nan Jiang,<sup>b</sup>  
Jianqiang Wang,<sup>c\*</sup> Zhiwei Liu,<sup>a\*</sup> Zuqiang Bian,<sup>a</sup> Zhenghong Lu,<sup>b</sup> and Chunhui Huang<sup>a</sup>

<sup>a</sup>Beijing National Laboratory for Molecular Sciences (BNLMS), State Key Laboratory of Rare Earth Materials Chemistry and Applications, College of Chemistry and Molecular Engineering, Peking University, Beijing 100871, P. R. China

<sup>b</sup>Department of Physics, Yunnan University, 2 Cuihu Bei Lu, Kunming, 650091, P. R. China.

<sup>c</sup>Key Laboratory of Interfacial Physics and Technology, Shanghai Institute of Applied Physics, Chinese Academy of Sciences, Shanghai 201204, P. R. China.

E-mails: zwliu@pku.edu.cn, wangjianqiang@sinap.ac.cn

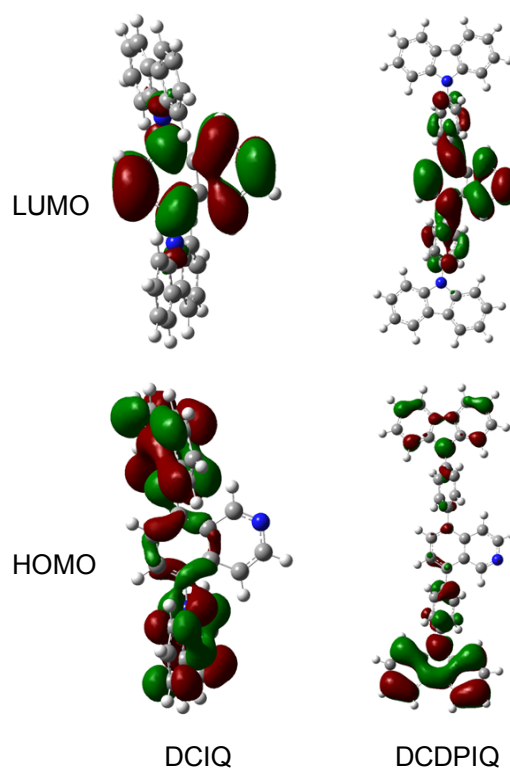

Fig. S1. DFT calculations of the spatial distributions of the HOMO and LUMO level for DCIQ and DCDPIQ.

Table S1. DFT calculated energy levels of DCIQ and DCDPIQ.

| Compound | HOMO-1<br>[eV] | HOMO<br>[eV] | LUMO<br>[eV] | LUMO+1<br>[eV] | $E_g$<br>[eV] | $T_1-S_0$<br>[eV] | $T_2-S_0$<br>[eV] |
|----------|----------------|--------------|--------------|----------------|---------------|-------------------|-------------------|
| DCIQ     | 6.22           | 6.05         | 2.25         | 1.54           | 3.80          | 2.36              | 2.95              |
| DCDPIQ   | 5.94           | 5.85         | 2.27         | 1.45           | 3.58          | 2.27              | 2.96              |

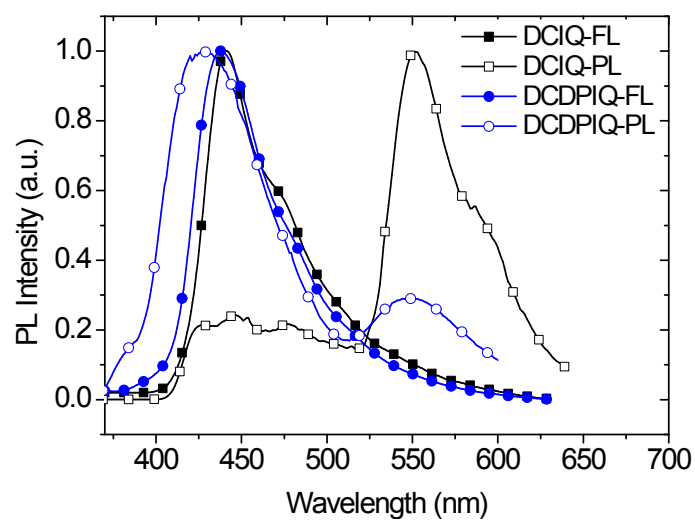

Fig. S2. Fluorescence (FL) and phosphorescence (PL) spectra of DCIQ and DCDPIQ in solid state.

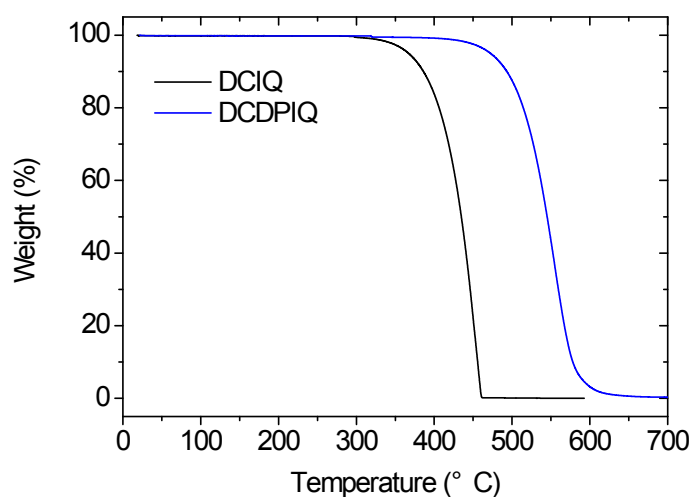

Fig. S3. TGA thermograms of DCIQ and DCDPIQ recorded at a heating rate of 15 °C min<sup>-1</sup>.

Table S2. Photophysical properties of codeposited CuI:CIQ (CIQ = DCIQ, DCDPIQ) films with different CuI:CIQ molar ratios.

| CuI:CIQ<br>molar ratio | DCIQ                |          | DCDPIQ              |          |
|------------------------|---------------------|----------|---------------------|----------|
|                        | $\lambda_{em}$ [nm] | PLQY [%] | $\lambda_{em}$ [nm] | PLQY [%] |
| 1:3                    | 631                 | 19       | 621                 | 15       |
| 1:5                    | 631                 | 24       | 621                 | 12       |
| 1:7                    | 631                 | 16       | 617                 | 14       |
| 1:9                    | 631                 | 16       | 615                 | 14       |
| 1:11                   | 627                 | 15       | 618                 | 13       |

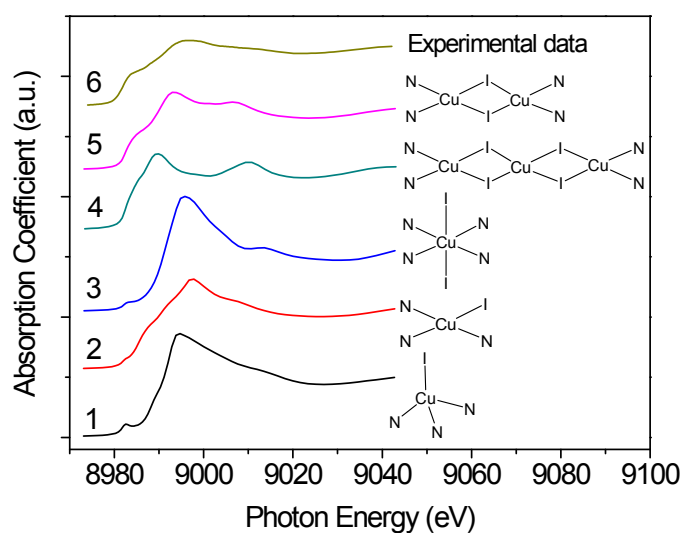

Fig. S4. Experimental data (curve 6) and calculated data (curves 1-5) for Cu *K*-edge XANES of the codeposited CuI:DCDPIQ film with corresponding local structure model on the right.

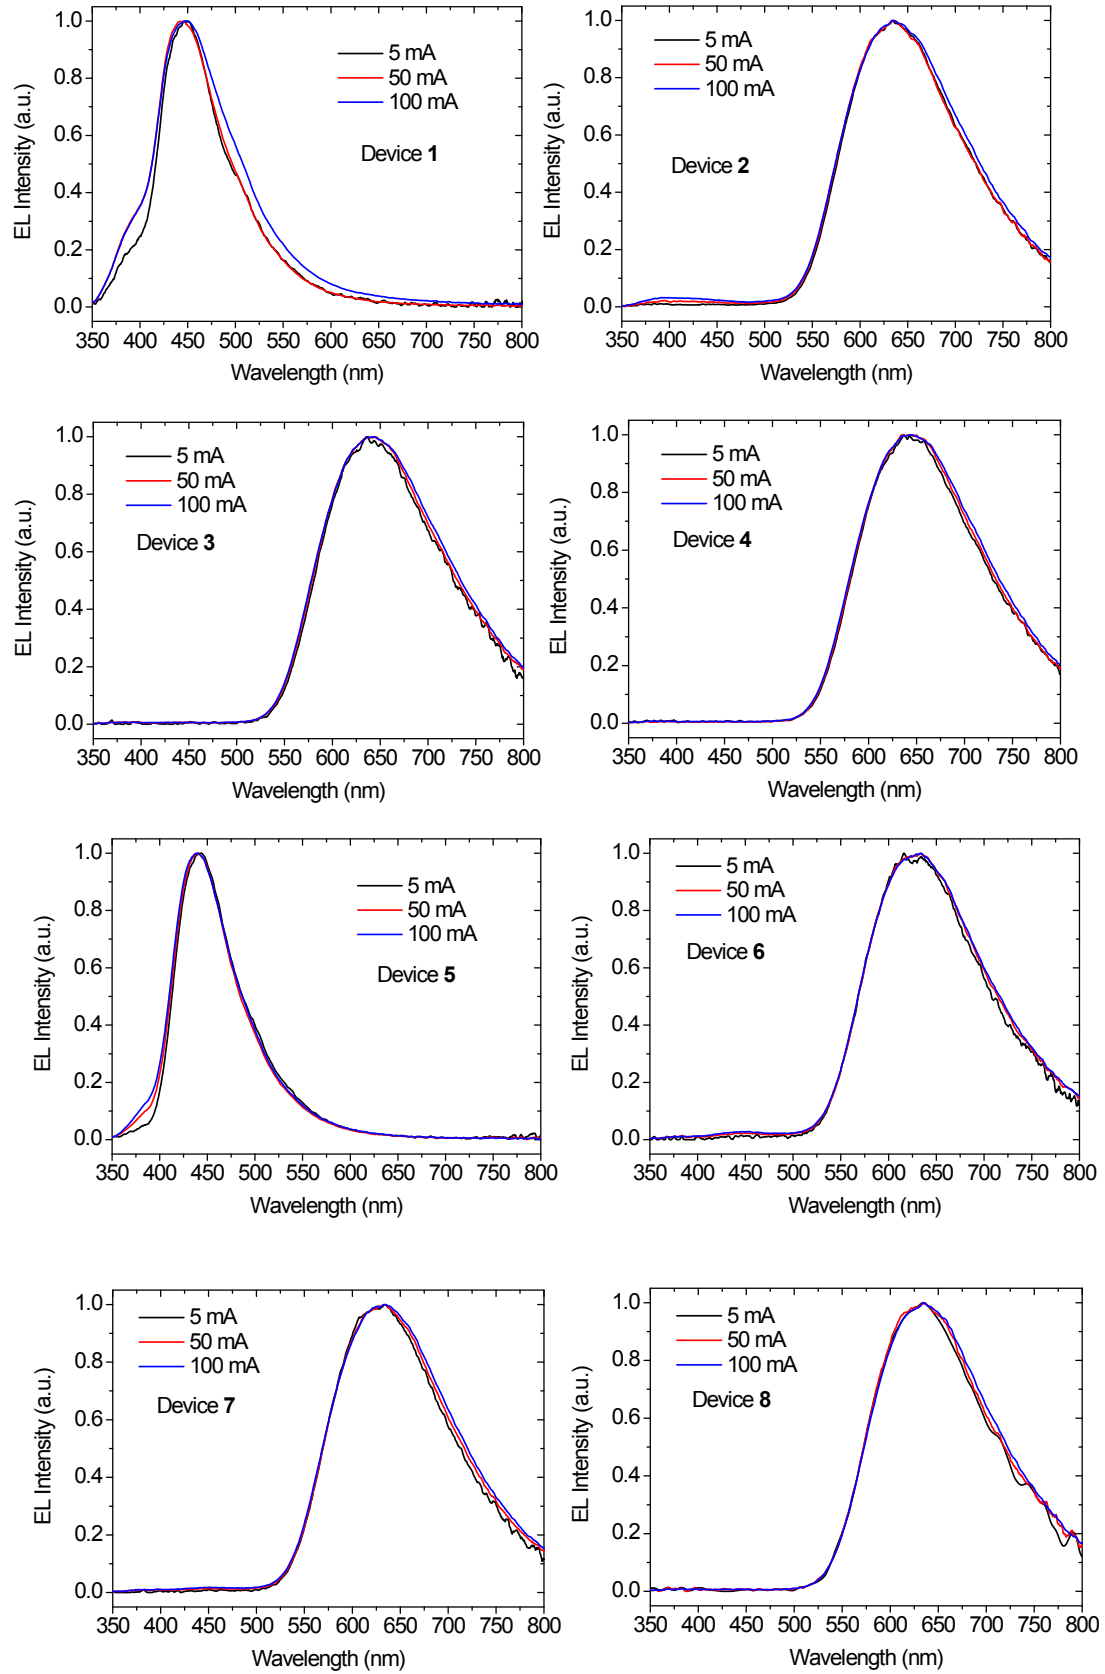

Fig. S5. EL spectra of devices 1-8 at different currents.
